# Supplementary material
Source: PubMed Central journal article supplement (PMC6726565)
Supplement: NIHMS1045877-supplement-Supp_info.pdf [file NIHMS1045877-supplement-Supp_info.pdf]

**Supplemental Table 1.** Per residue interaction of **3a-3d** with Rev1-CT.

| Residue      | Compound Interaction | 3a           | 3b           | 3c           | 3d           | Residue      | Compound Interaction | 3a           | 3b           | 3c            | 3d            |
|--------------|----------------------|--------------|--------------|--------------|--------------|--------------|----------------------|--------------|--------------|---------------|---------------|
| <b>L1159</b> | van der Waals        | -0.96        | -0.94        | ---          | ---          | <b>D1186</b> | van der Waals        | -1.18        | -1.07        | -0.69         | -0.35         |
|              | Electrostatic        | -0.02        | 0.08         | ---          | ---          |              | Electrostatic        | -3.37        | -16.34       | -46.86        | -50.66        |
|              | Polar Solvation      | -0.13        | -0.20        | ---          | ---          |              | Polar Solvation      | 1.92         | 15.86        | 37.97         | 40.29         |
|              | Non-Polar Solv.      | -0.69        | -0.69        | ---          | ---          |              | Non-Polar Solv.      | -1.05        | -0.91        | -1.44         | -1.42         |
|              | <b>TOTAL</b>         | <b>-1.81</b> | <b>-1.75</b> | ---          | ---          |              | <b>TOTAL</b>         | <b>-3.68</b> | <b>-2.46</b> | <b>-11.02</b> | <b>-12.15</b> |
| <b>A1160</b> | van der Waals        | -0.89        | -0.79        | -0.79        | -0.76        | <b>Q1189</b> | van der Waals        | -1.06        | -0.73        | -0.70         | -0.80         |
|              | Electrostatic        | 0.01         | -0.28        | 0.03         | 0.24         |              | Electrostatic        | -0.05        | 0.38         | 0.50          | -0.92         |
|              | Polar Solvation      | 0.00         | 0.31         | -0.01        | -0.24        |              | Polar Solvation      | -0.17        | -0.30        | -0.35         | 0.68          |
|              | Non-Polar Solv.      | -0.81        | -0.68        | -0.68        | -0.61        |              | Non-Polar Solv.      | -0.80        | -0.56        | -0.51         | -0.55         |
|              | <b>TOTAL</b>         | <b>-1.69</b> | <b>-1.43</b> | <b>-1.45</b> | <b>-1.37</b> |              | <b>TOTAL</b>         | <b>-2.08</b> | <b>-1.22</b> | <b>-1.06</b>  | <b>-1.59</b>  |
| <b>L1171</b> | van der Waals        | -1.14        | -2.10        | -0.81        | -0.77        | <b>L1172</b> | van der Waals        | ---          | -0.69        | -1.71         | -1.10         |
|              | Electrostatic        | -0.12        | -1.77        | 0.55         | 0.62         |              | Electrostatic        | ---          | -0.39        | -0.65         | -0.57         |
|              | Polar Solvation      | -0.12        | 0.85         | -0.59        | -0.66        |              | Polar Solvation      | ---          | 0.38         | 0.36          | 0.34          |
|              | Non-Polar Solv.      | -0.88        | -1.49        | -0.61        | -0.59        |              | Non-Polar Solv.      | ---          | -0.38        | -1.17         | -0.78         |
|              | <b>TOTAL</b>         | <b>-2.25</b> | <b>-4.51</b> | <b>-1.45</b> | <b>-1.39</b> |              | <b>TOTAL</b>         | <b>---</b>   | <b>-1.08</b> | <b>-3.15</b>  | <b>-2.11</b>  |
| <b>E1174</b> | van der Waals        | -0.35        | -0.61        | -0.78        | -0.73        |              |                      |              |              |               |               |
|              | Electrostatic        | -0.23        | -47.9        | -15.9        | -15.4        |              |                      |              |              |               |               |
|              | Polar Solvation      | 0.06         | 38.7         | 15.5         | 14.9         |              |                      |              |              |               |               |
|              | Non-Polar Solv.      | -0.27        | -1.44        | -0.68        | -0.57        |              |                      |              |              |               |               |
|              | <b>TOTAL</b>         | <b>-0.79</b> | <b>-11.2</b> | <b>-1.86</b> | <b>-1.80</b> |              |                      |              |              |               |               |
| <b>W1175</b> | van der Waals        | -2.97        | -3.00        | -3.17        | -3.20        |              |                      |              |              |               |               |
|              | Electrostatic        | -0.30        | -0.30        | 0.63         | 0.09         |              |                      |              |              |               |               |
|              | Polar Solvation      | 0.54         | 0.40         | -0.58        | -0.46        |              |                      |              |              |               |               |
|              | Non-Polar Solv.      | -1.84        | -1.82        | -1.91        | -1.89        |              |                      |              |              |               |               |
|              | <b>TOTAL</b>         | <b>-4.57</b> | <b>-4.72</b> | <b>-5.04</b> | <b>-5.47</b> |              |                      |              |              |               |               |
| <b>I1179</b> | van der Waals        | ---          | ---          | -1.09        | -1.07        |              |                      |              |              |               |               |
|              | Electrostatic        | ---          | ---          | 0.65         | 0.67         |              |                      |              |              |               |               |
|              | Polar Solvation      | ---          | ---          | -0.66        | -0.68        |              |                      |              |              |               |               |
|              | Non-Polar Solv.      | ---          | ---          | -0.82        | -0.79        |              |                      |              |              |               |               |
|              | <b>TOTAL</b>         | <b>---</b>   | <b>---</b>   | <b>-1.92</b> | <b>-1.87</b> |              |                      |              |              |               |               |

**Supplemental Table 2.** Structure and activity of additional virtual screening hits.

| Compound | Structure | Glide Score | FP IC <sub>50</sub> (μM) |
|----------|-----------|-------------|--------------------------|
| 12       |           | -7.175      | 18.6 ± 2.5               |
| 13       |           | -6.976      | 45.5 ± 1.9               |
| 14       |           | -6.825      | >50                      |
| 15       |           | -6.307      | 22.8 ± 3.4               |
| 16       |           | -6.23       | 20.9 ± 4.4               |
| 17       |           | -6.213      | 22.4 ± 2.8               |
| 18       |           | -5.942      | 21.1 ± 1.9               |
| 19       |           | -5.924      | 44.9 ± 0.8               |
| 20       |           | -6.183      | 41.2 ± 3.7               |
| 21       |           | -5.694      | >50                      |
| 22       |           | -5.65       | 47.6 ± 12.4              |
| 23       |           | -5.508      | 45.8 ± 3.0               |
| 24       |           | -5.493      | >50                      |

|    |                                                                                     |        |            |
|----|-------------------------------------------------------------------------------------|--------|------------|
| 25 | 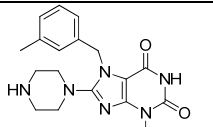   | -5.305 | >50        |
| 26 |    | -5.25  | >50        |
| 27 |    | -5.24  | >50        |
| 28 |    | -5.219 | 43.1 ± 4.2 |
| 29 |    | -5.217 | >50        |
| 30 |   | -5.145 | 43.0 ± 4.0 |
| 31 |  | -5.13  | >50        |
| 32 |  | -5.091 | >50        |
| 33 |  | -5.052 | 45.3 ± 4.0 |
| 34 |  | -4.998 | >50        |
| 35 |  | -4.987 | 46.6 ± 4.0 |

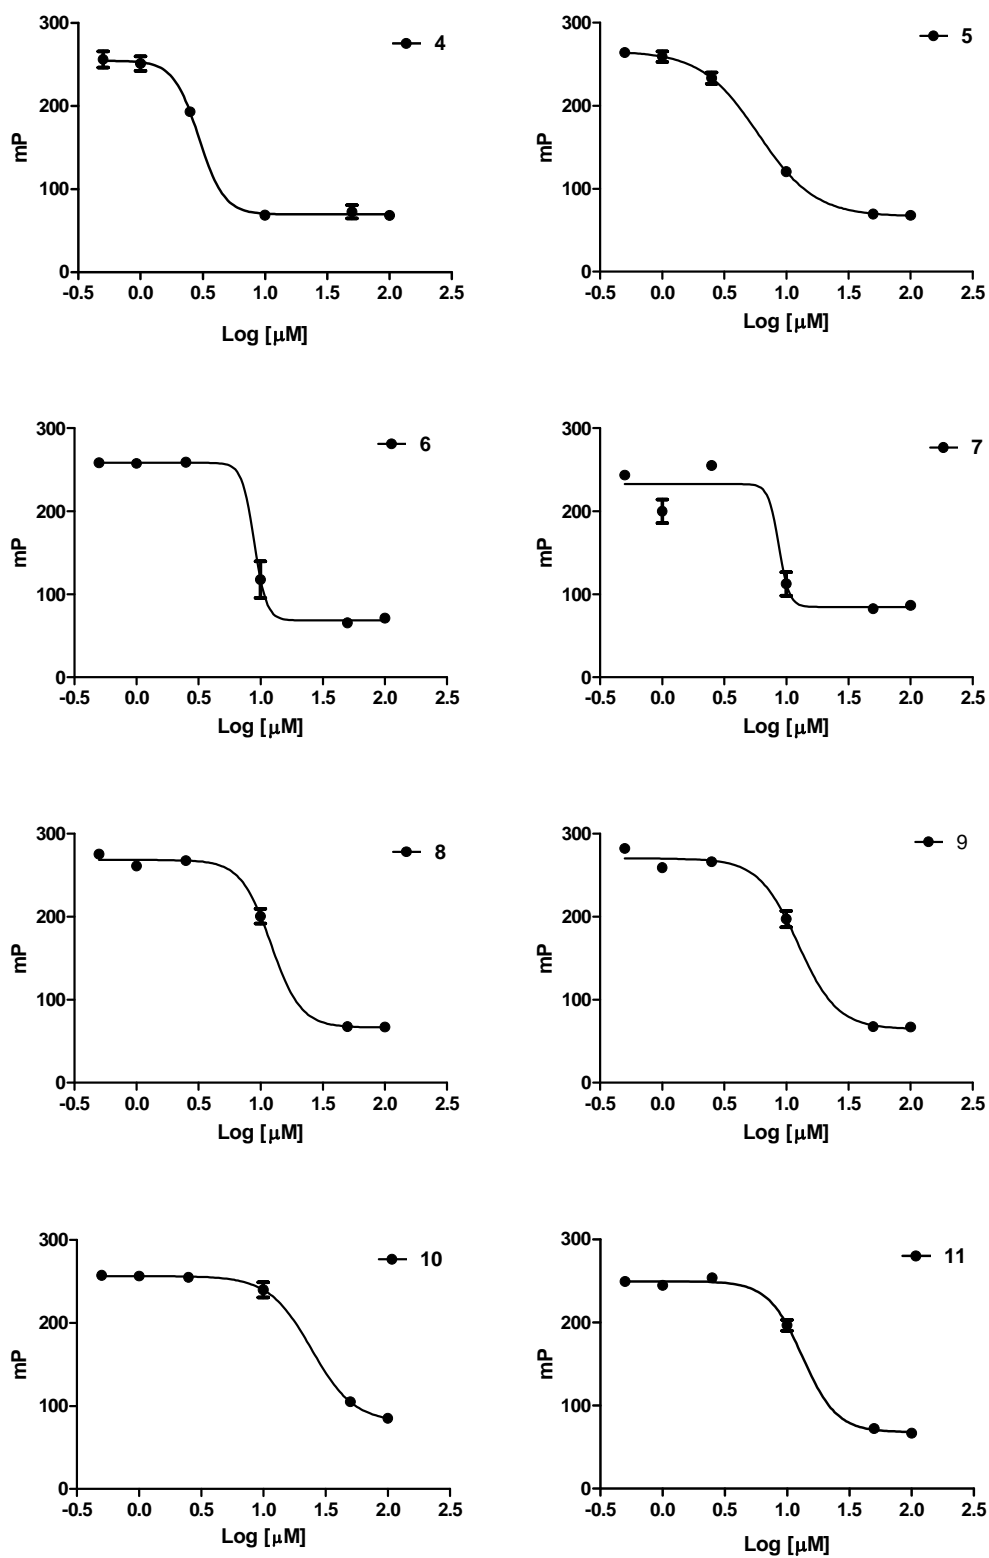

**Supplemental Figure 1.** Representative fluorescence polarization graphs for hit compounds 4 – 11.

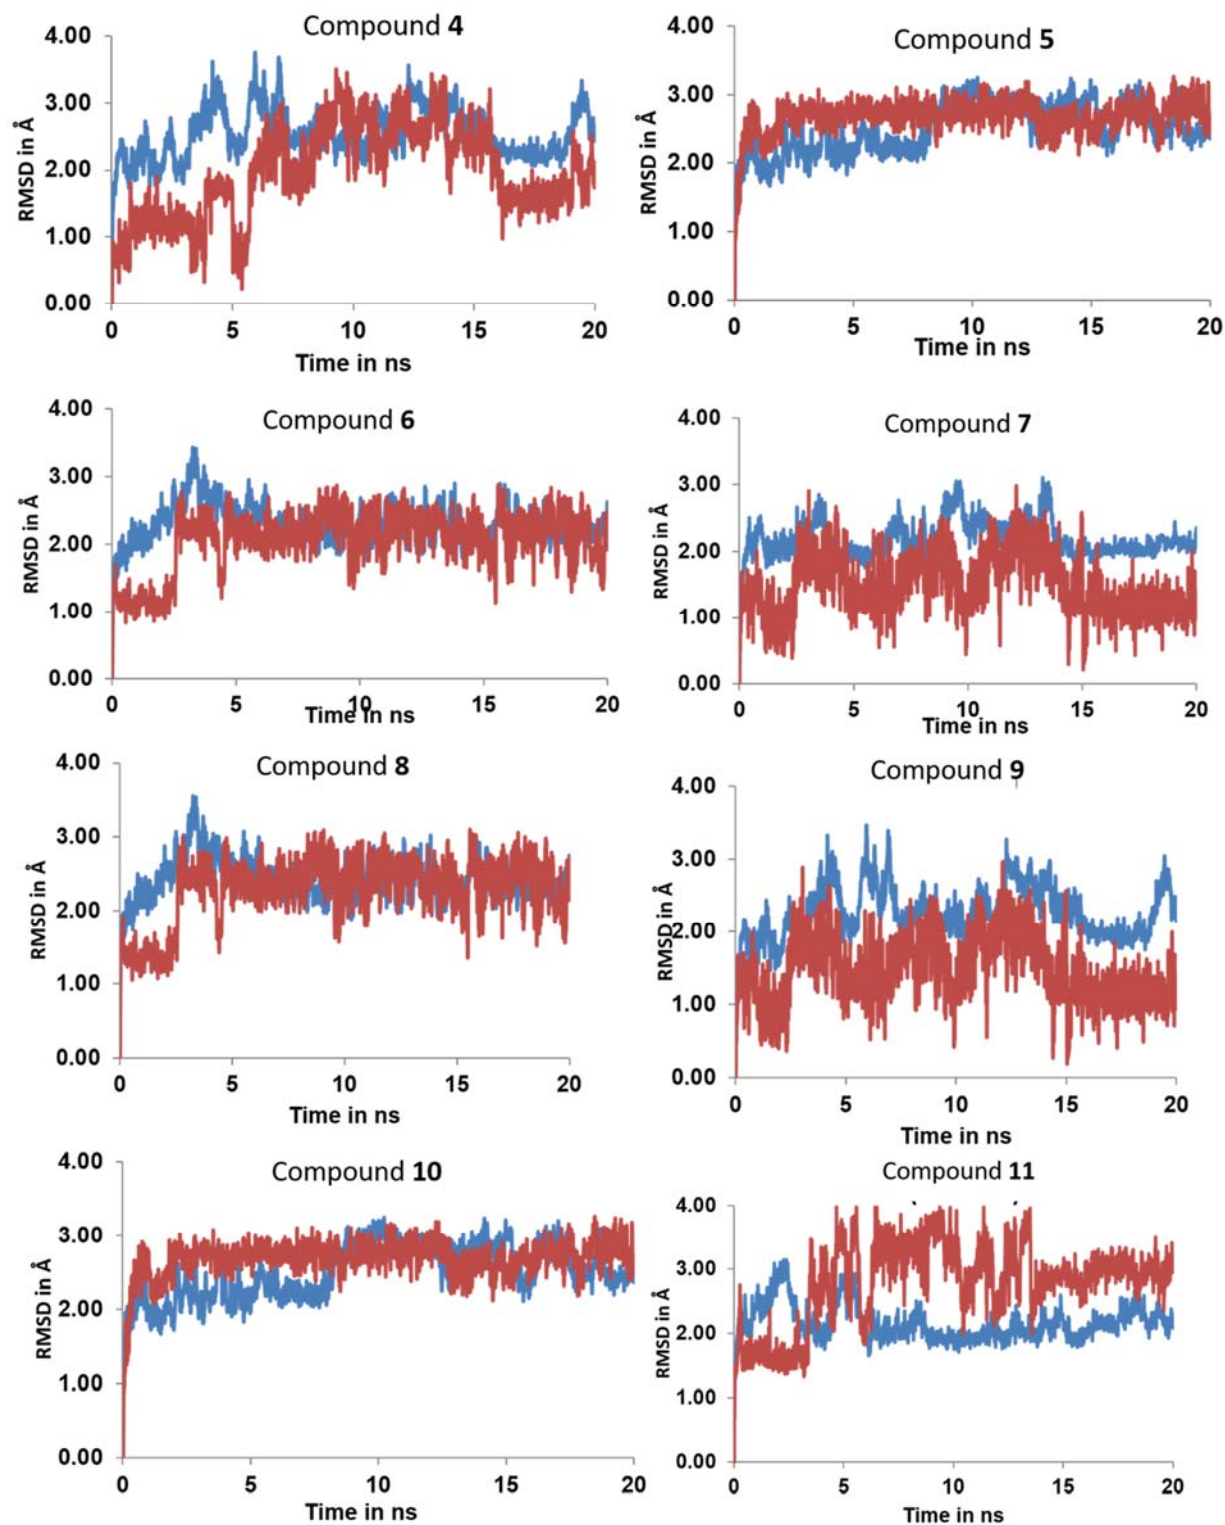

**Supplemental Figure 2.** RMSD plots for lead compounds **4-11** in complex with Rev1-CT during 20 ns MD simulations.

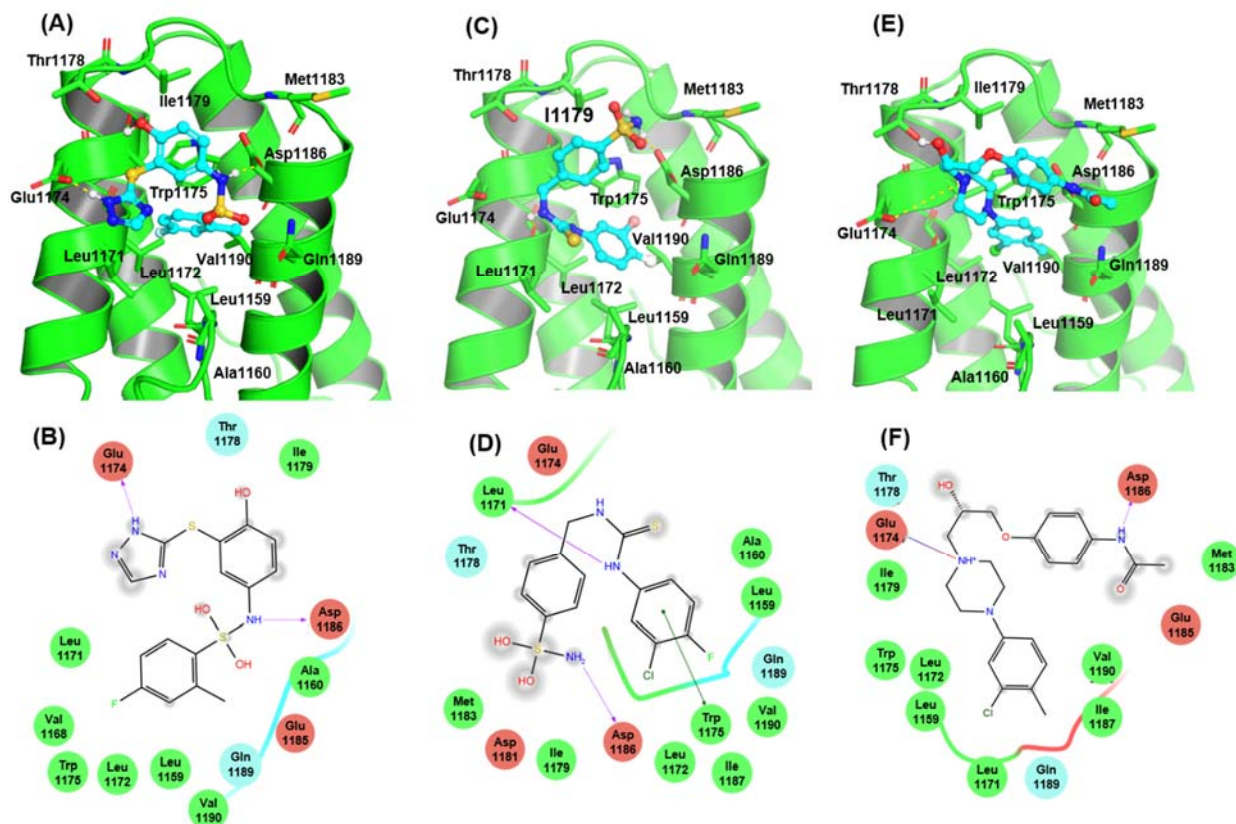

**Supplemental Figure 3.** Binding conformations and key interactions with Rev1-CT for compounds **7** (A and B), **8**, (C and D), and **9** (E and F). Green circles = hydrophobic residues. Red circles = negatively charged residues. Blue circles = positively charged residues. Green line =  $\pi$ - $\pi$  interaction. Purple arrow = hydrogen bond.

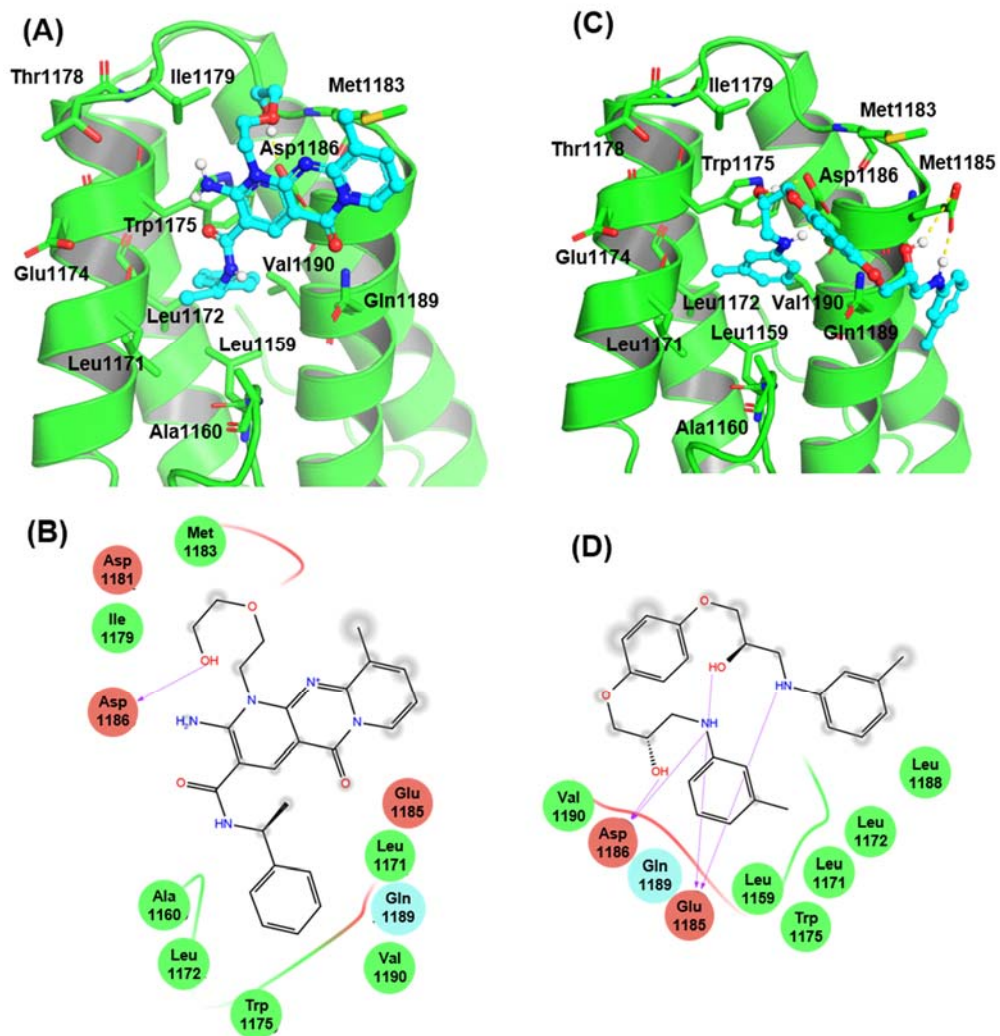

**Supplemental Figure 4.** Binding conformations and key interactions with Rev1-CT for compounds **10** (A and B), and **11** (C and D). Green circles = hydrophobic residues. Red circles = negatively charged residues. Blue circles = positively charged residues. Green line =  $\pi$ - $\pi$  interaction. Purple arrow = hydrogen bond.

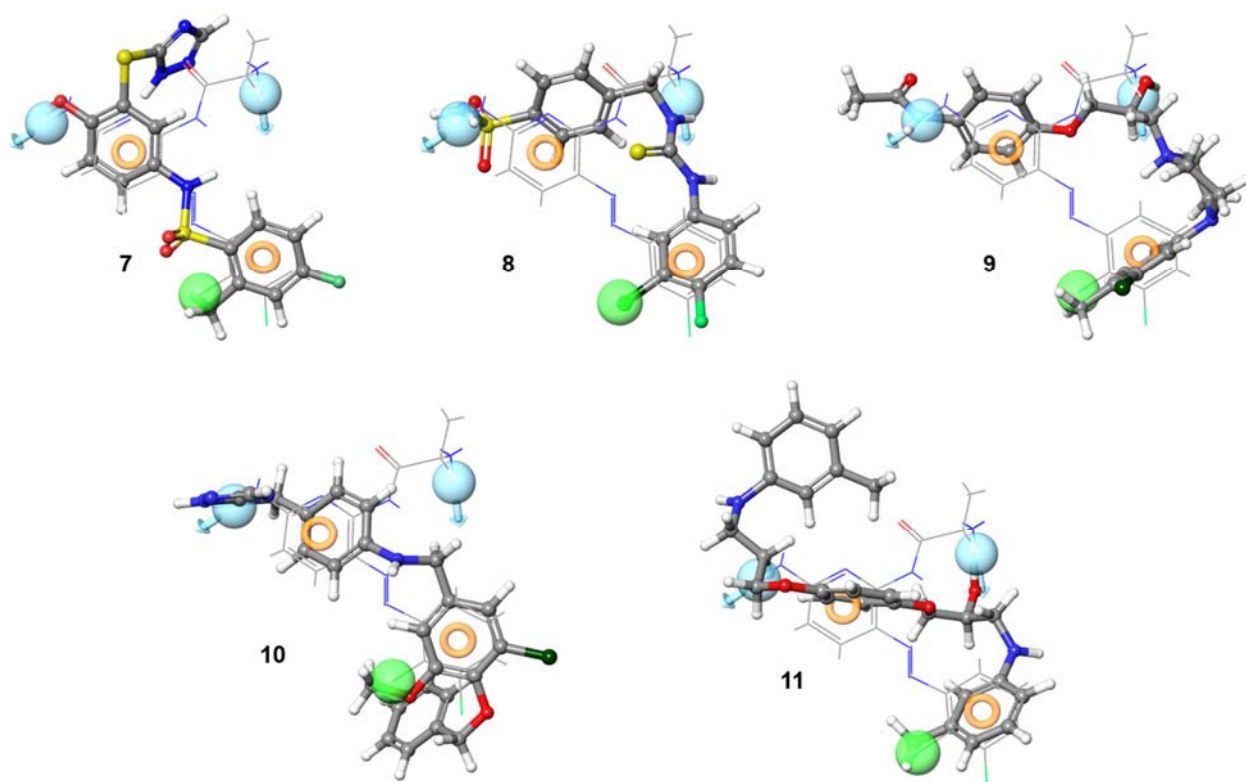

**Supplemental Figure 5.** Three-dimensional overlap of hit compounds **7-11** with the E-pharmacophore derived from PAP analogues **3a-3d**.
